# Supplementary material
Source: PubMed Central journal article supplement (PMC6816858)

# *bfpAR*

File: Supplementary file 1bfpA R.ab1 Run Ended: Oct 9, 2015, 3:41:30 Signal G:349 A:549 T:567 C:532 Comment:  
Sample: 2 2R\_S015127 Lane: 21 Base spacing 14.12 314 bases in 3913 scans Page 1 of 1

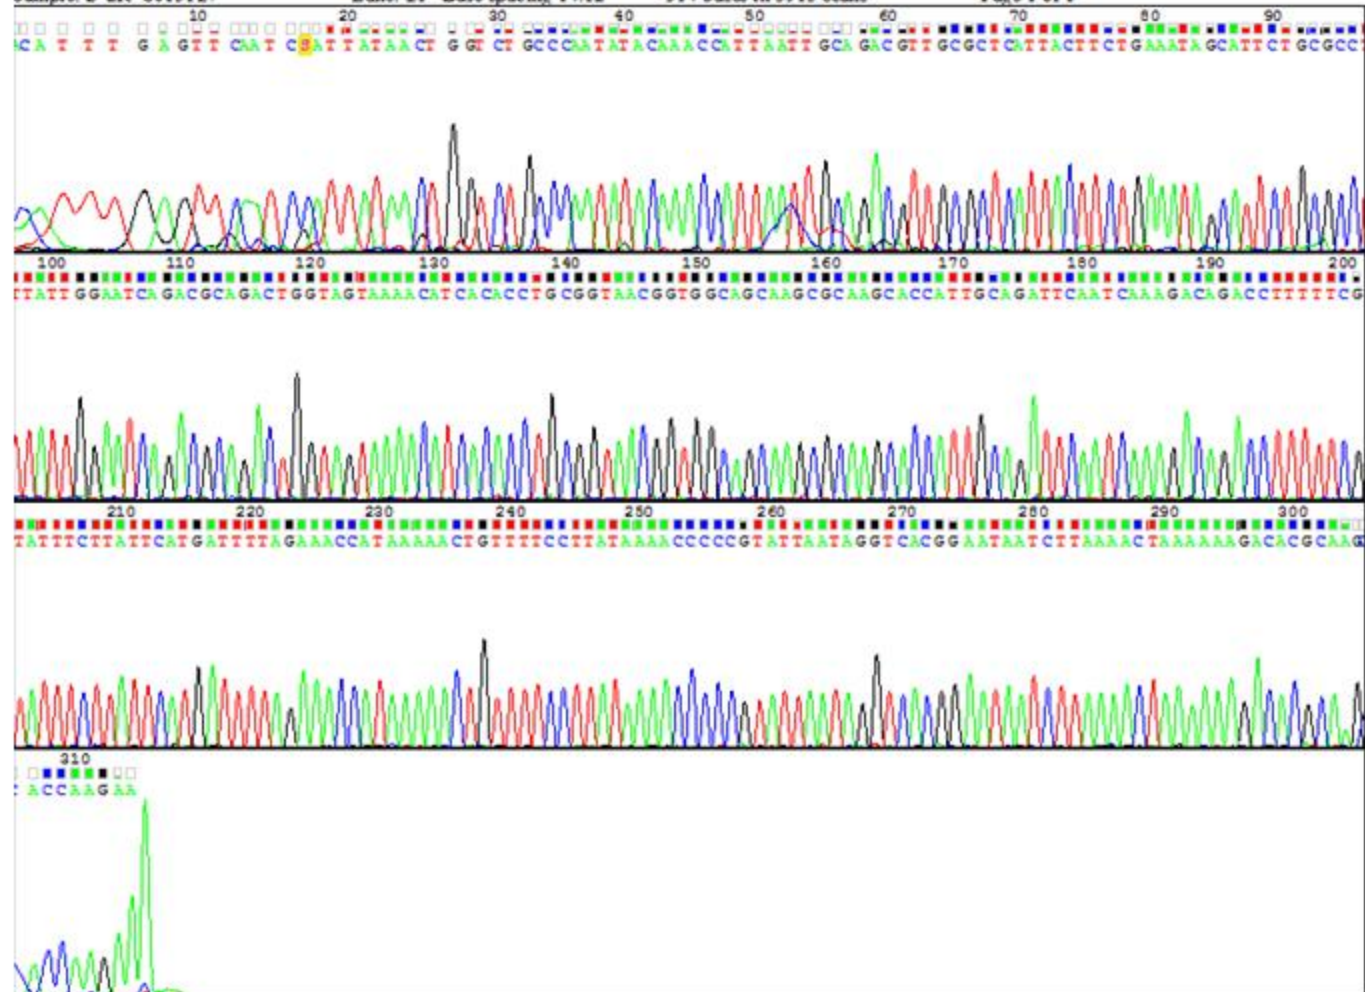

Supplement: JCLA-32-e22388-s006.pdf [file JCLA-32-e22388-s006.pdf]
