# Supplementary material
Source: PubMed Central journal article supplement (PMC6816858)

# *bfpAF*

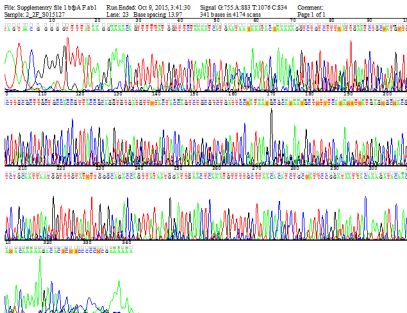

Supplement: JCLA-32-e22388-s005.pdf [file JCLA-32-e22388-s005.pdf]

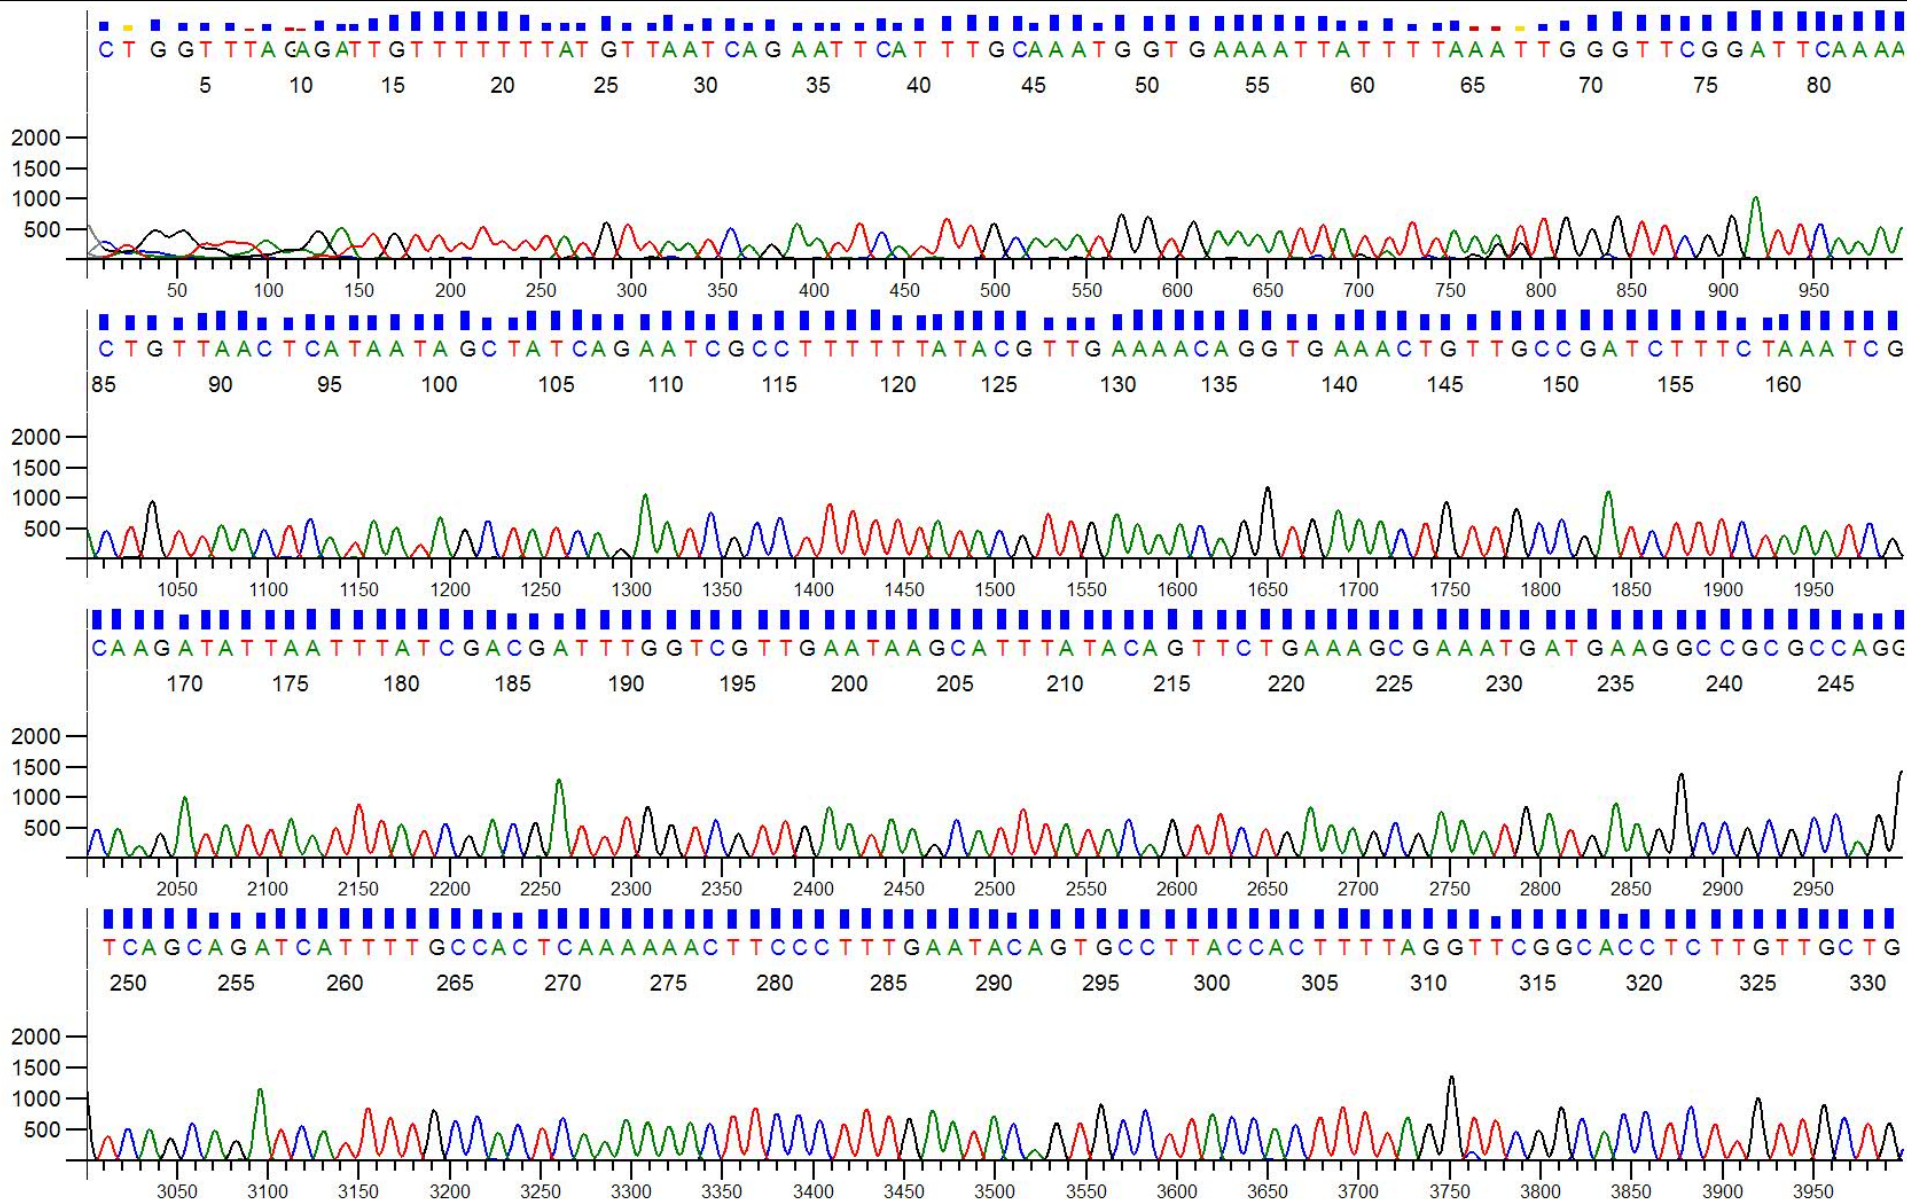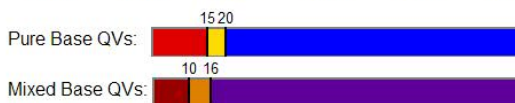

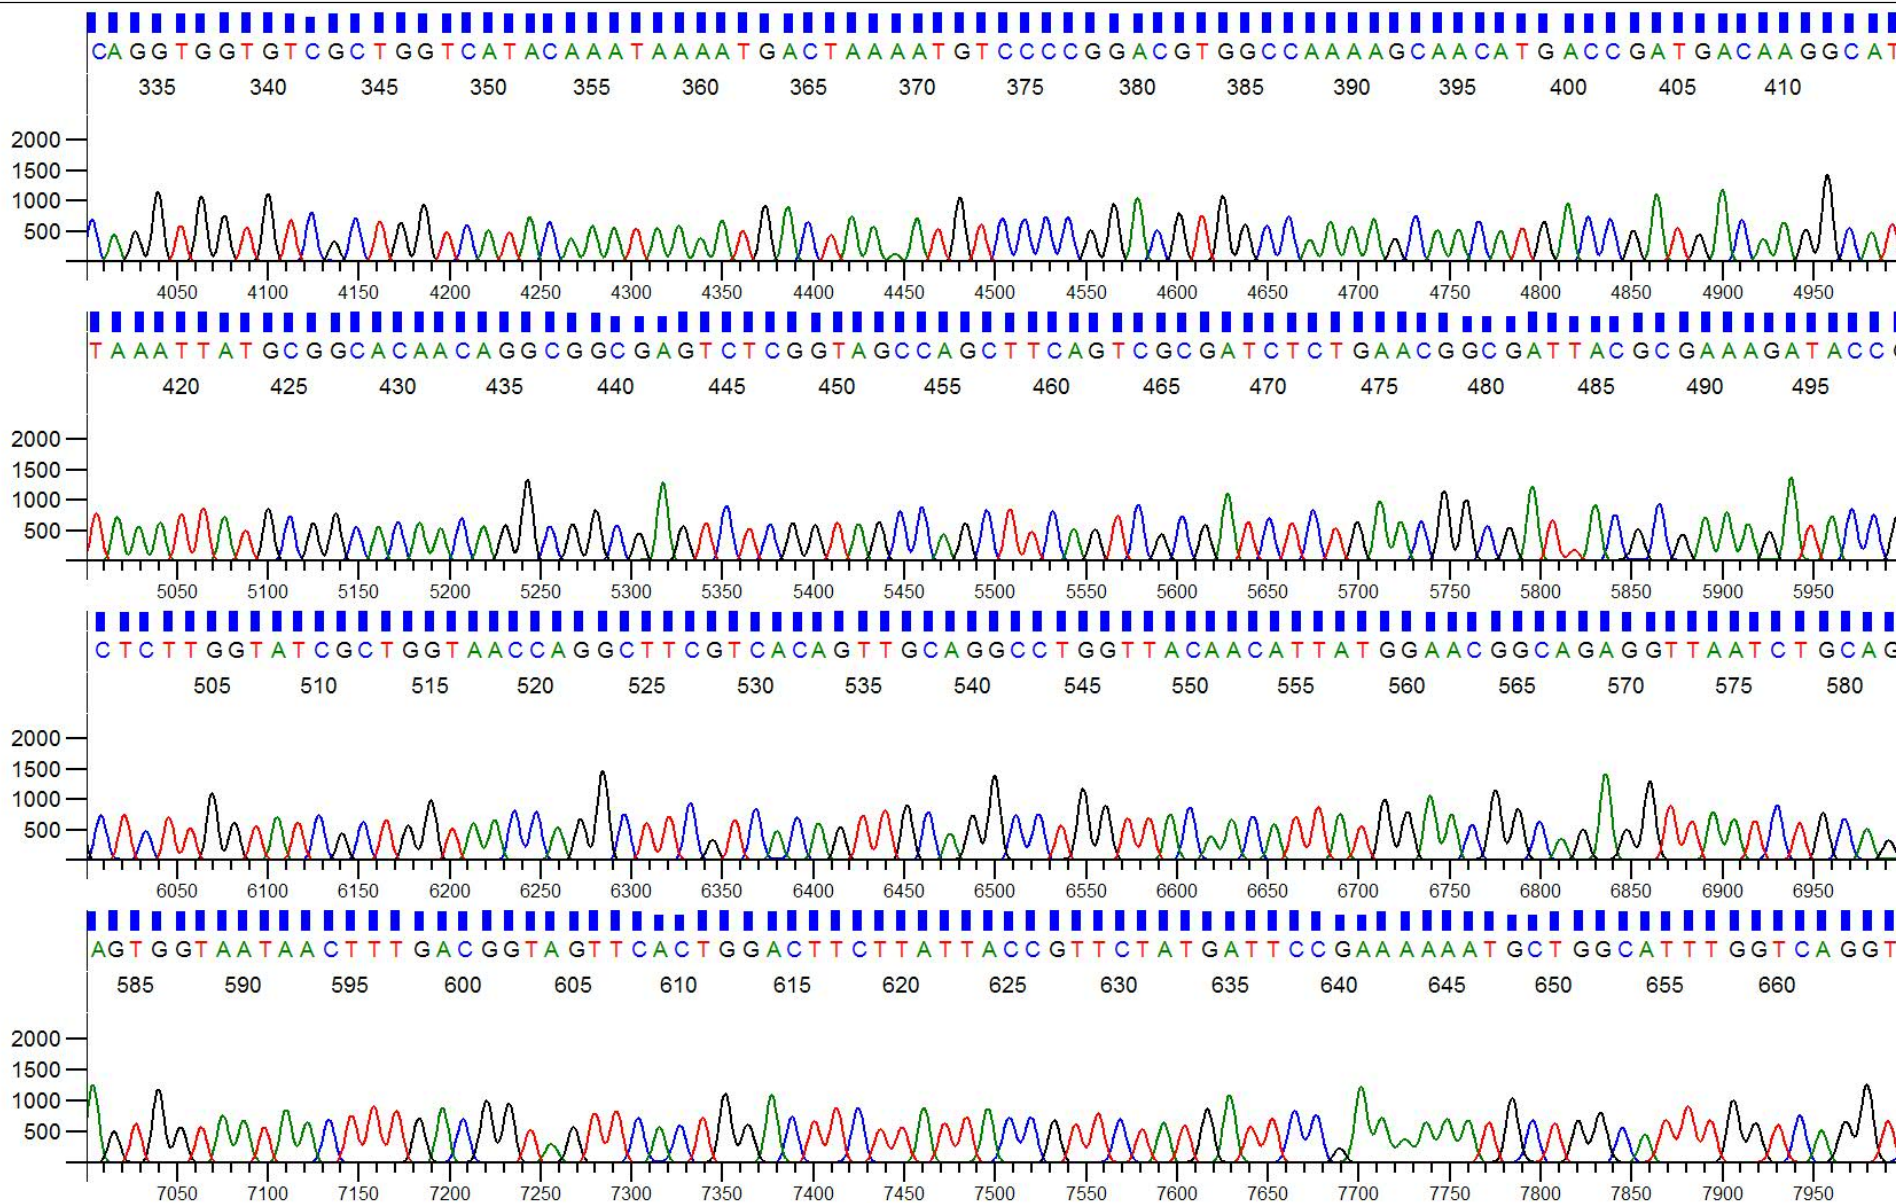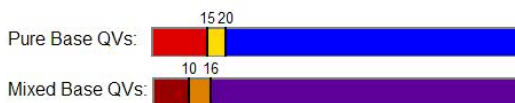

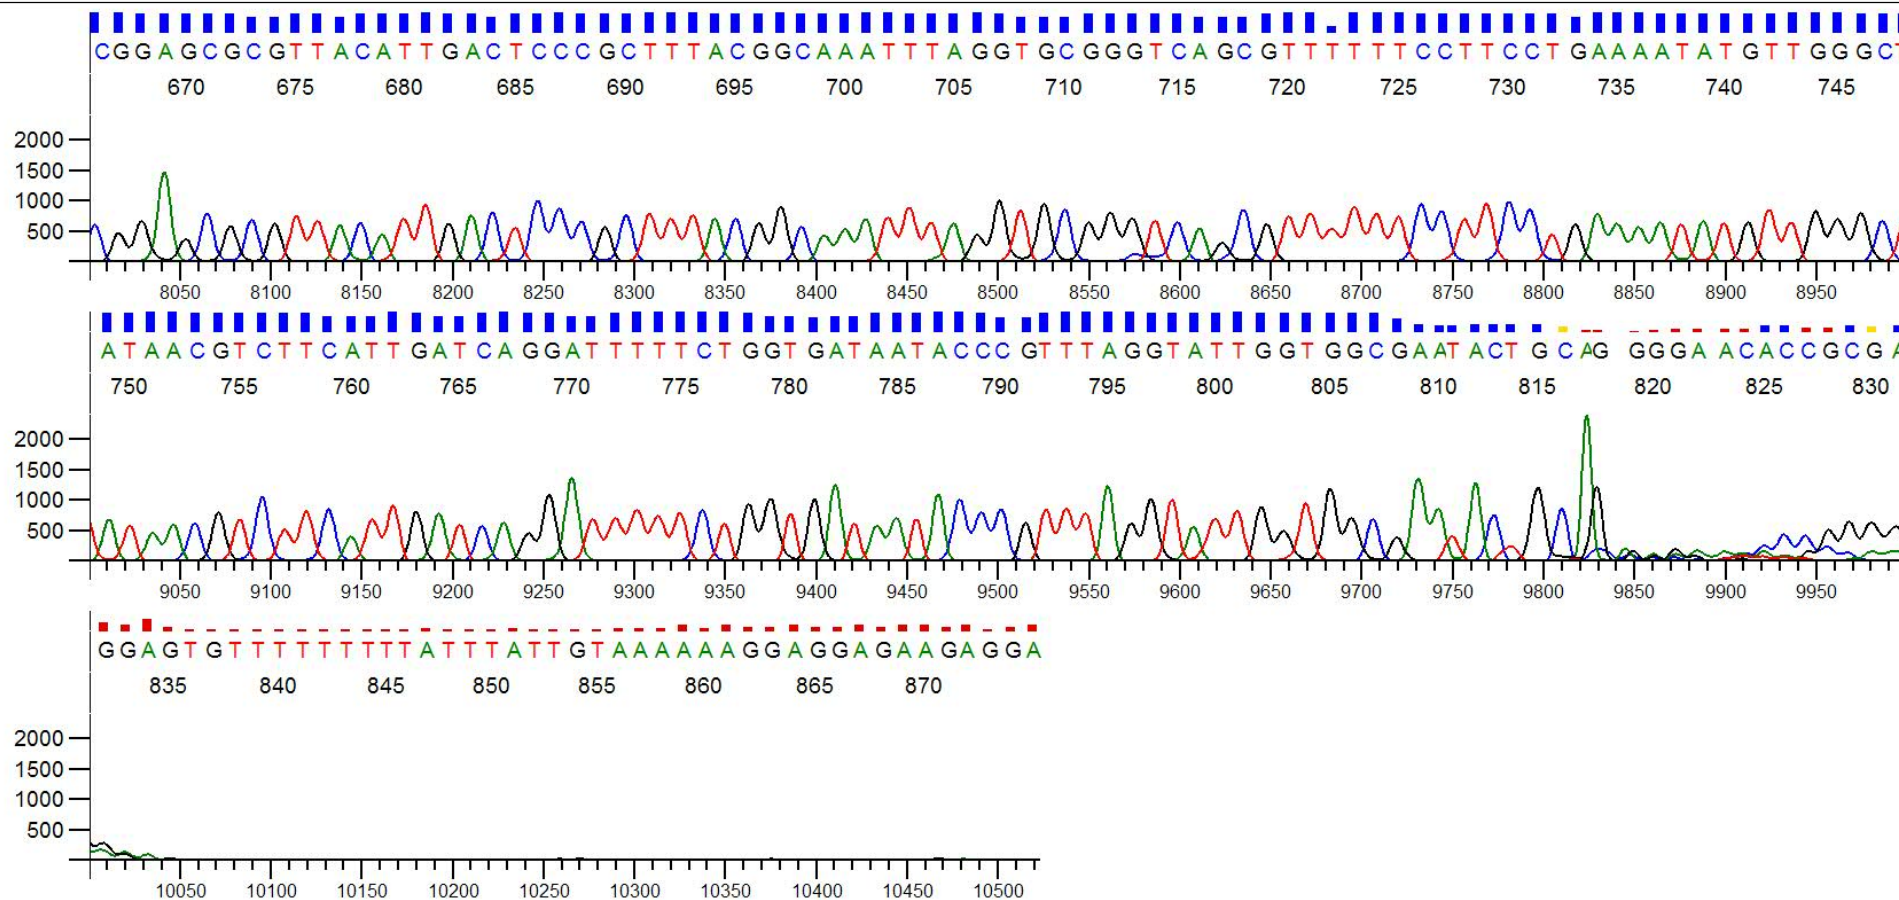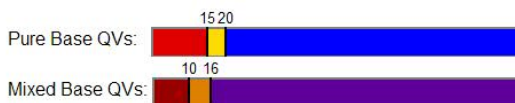

Supplement: JCLA-32-e22388-s007.pdf [file JCLA-32-e22388-s007.pdf]

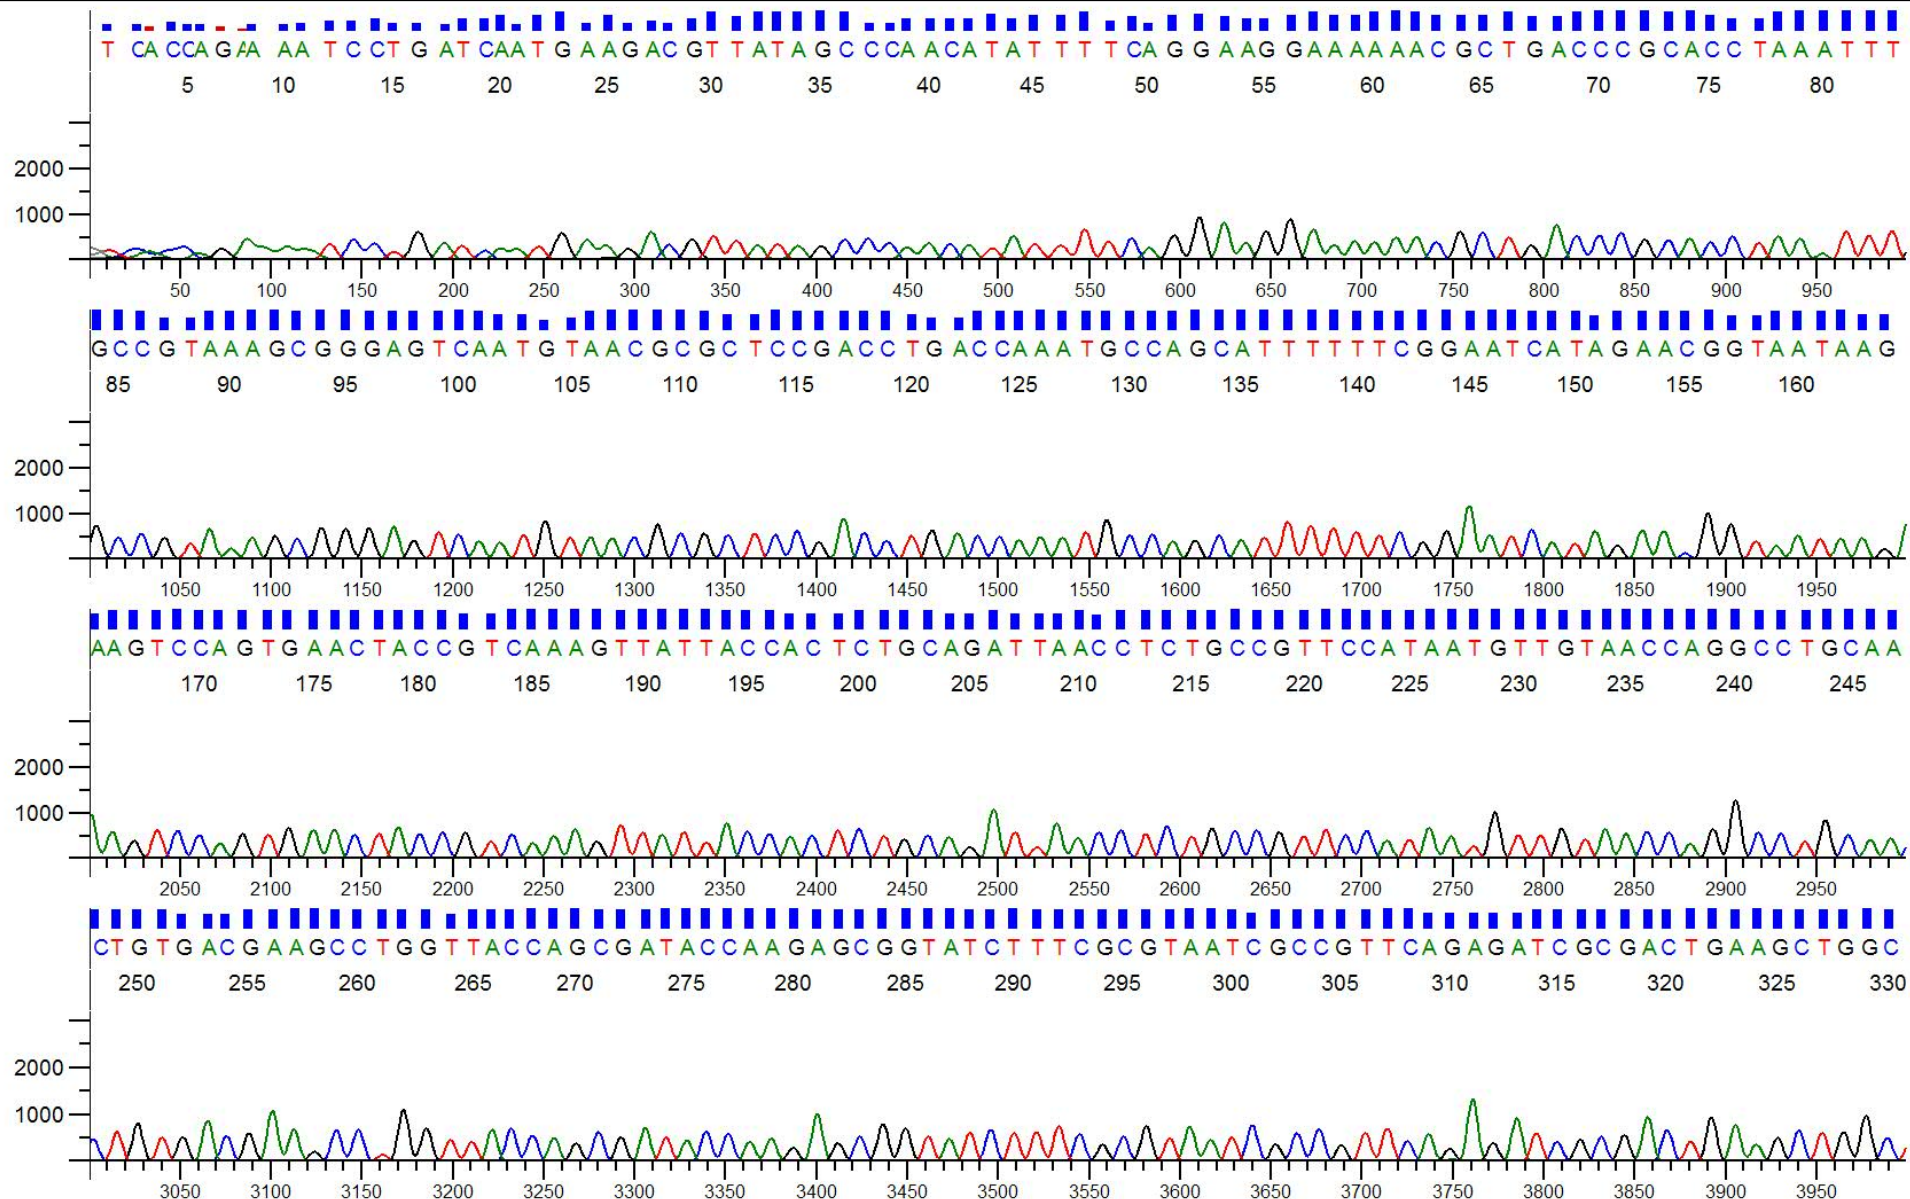

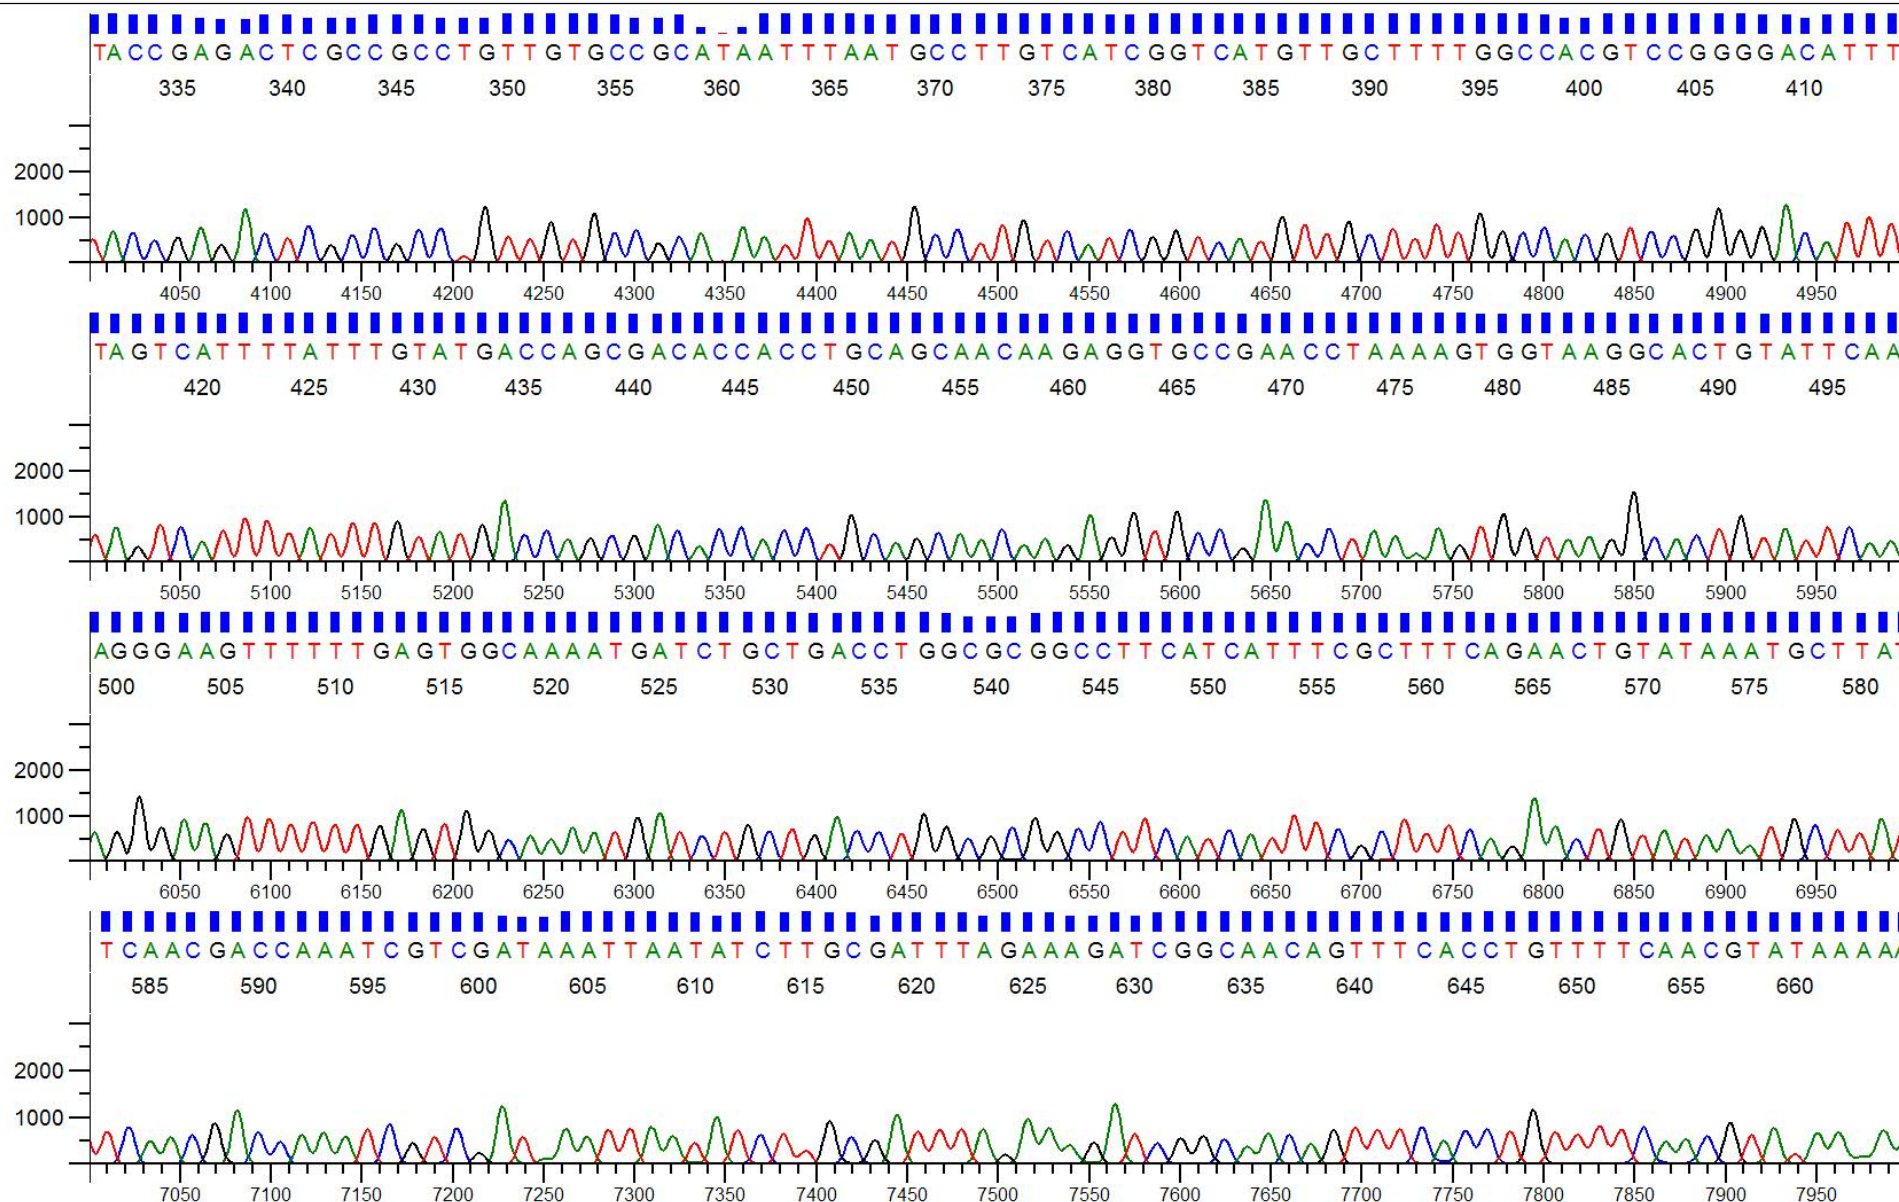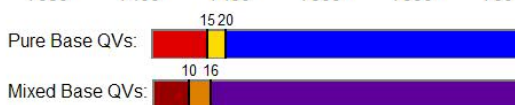

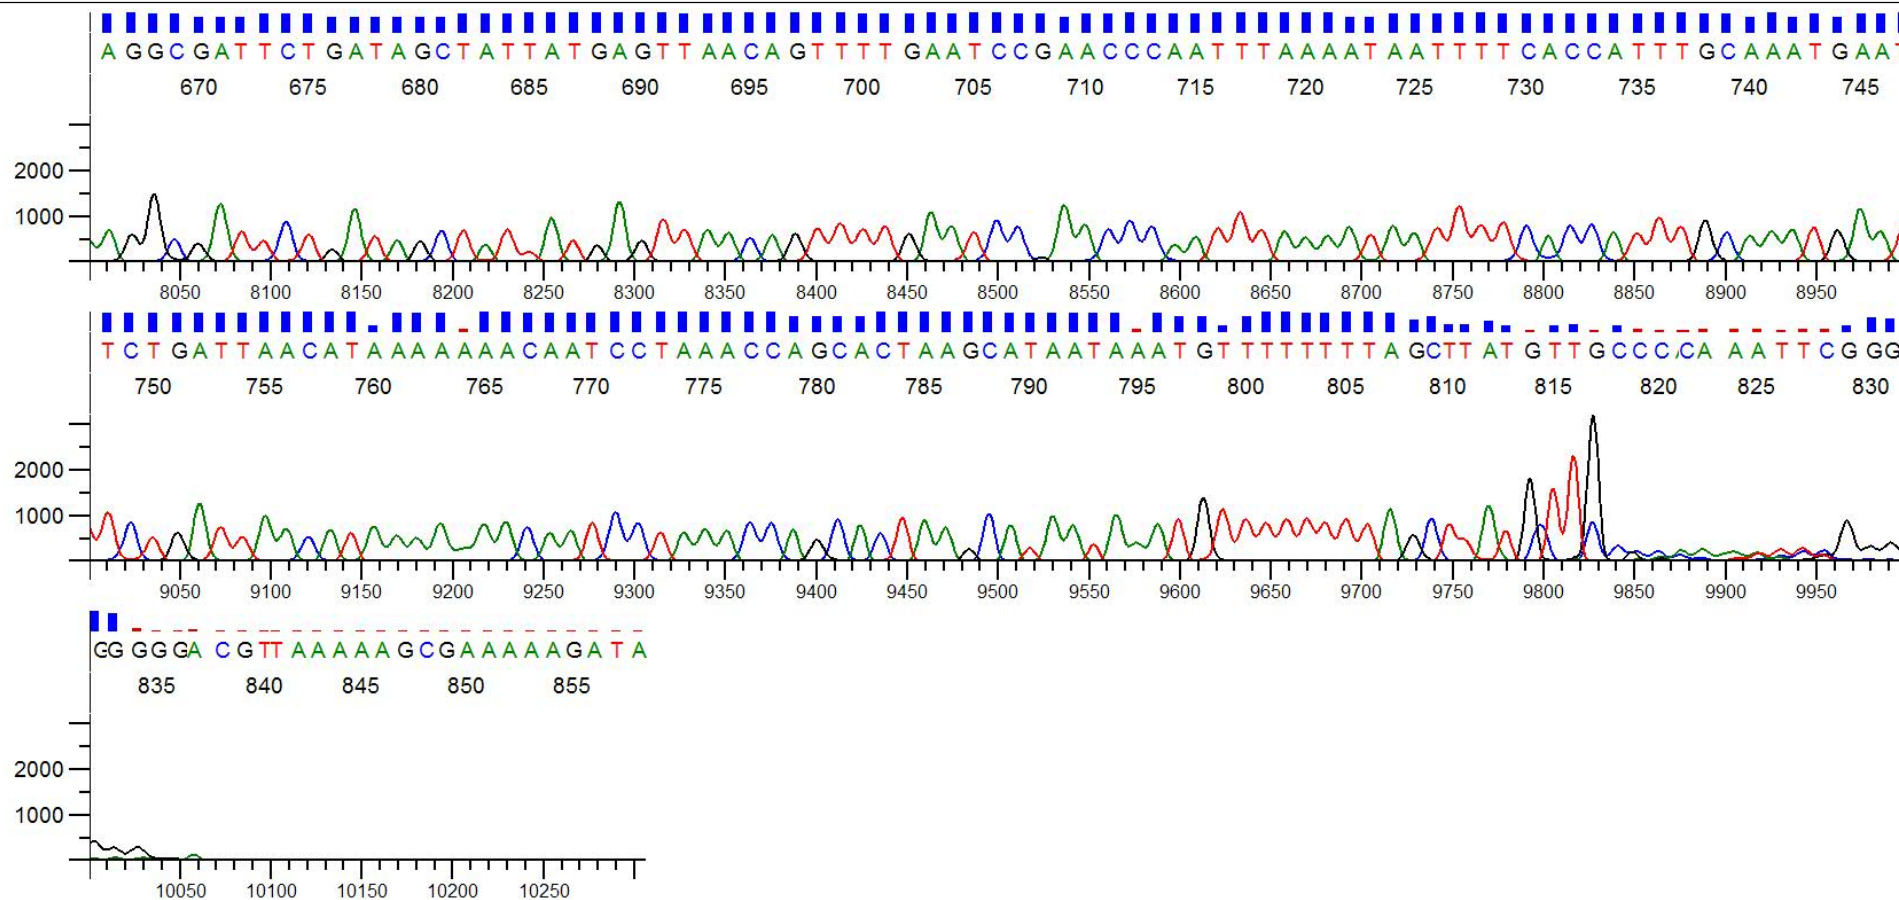

Supplement: JCLA-32-e22388-s008.pdf [file JCLA-32-e22388-s008.pdf]

# *pCVD R*

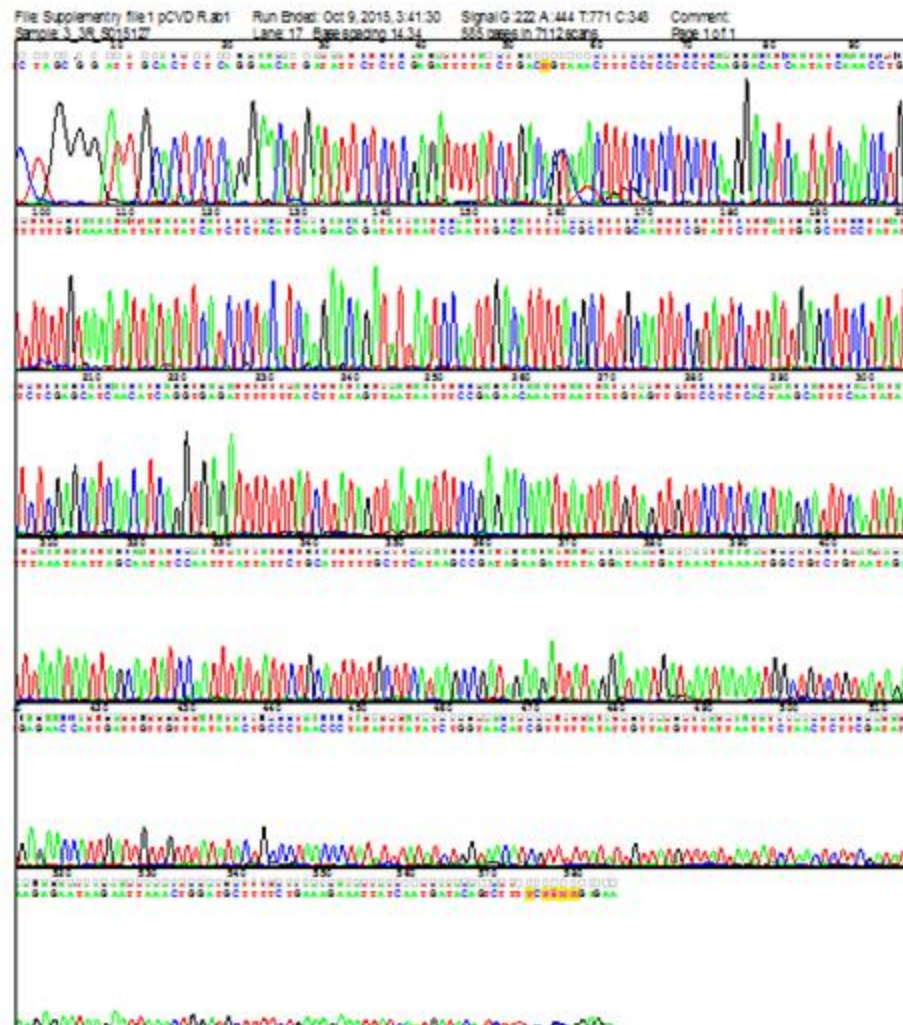

Supplement: JCLA-32-e22388-s010.pdf [file JCLA-32-e22388-s010.pdf]
